# Supplementary material for: Development and Validation of a Mortality Risk Score for Repaired Tetralogy of Fallot
Source: PubMed Central journal article supplement — J Am Heart Assoc. 2024 Jun 11;13(12):e034871. doi: 10.1161/JAHA.123.034871 (PMC11255736; doi:10.1161/jaha.123.034871), 2024-06-11
Supplement: JAH3-13-e034871-s001.pdf [file JAH3-13-e034871-s001.pdf]

# **SUPPLEMENTAL MATERIAL**

**Table S1. rTOF Deceased Cohort—Demographic, Anatomic, Surgical, CMR, and Arrhythmia Characteristics Stratified by Cause of Death.**

| Variable                          | Cardiac death<br>N=47 | Noncardiac death<br>N=24 | Unknown<br>N=28    | p-value |
|-----------------------------------|-----------------------|--------------------------|--------------------|---------|
| <b>Demographics</b>               |                       |                          |                    |         |
| Median age at repair, years       | 9.28 (6.36, 17.27)    | 6.58 (4.64, 13.51)       | 5.00 (2.28, 16.01) | 0.22    |
| Year of TOF repair ≤1985          | 37 (78.7%)            | 19 (79.2%)               | 20 (71.4%)         | 0.73    |
| Median age at initial CMR, years  | 43.9 (32.9, 50.7)     | 39.0 (24.2, 48.4)        | 35.5 (23.5, 56.2)  | 0.51    |
| Follow-up time, years             | 7.64 ± 3.98           | 7.35 ± 4.26              | 8.91 ± 4.31        | 0.33    |
| Sex (male)                        | 26 (55.3%)            | 14 (58.3%)               | 16 (57.1%)         | 0.97    |
| Race                              |                       |                          |                    | 0.25    |
| Hispanic                          | 0 (0%)                | 0 (0%)                   | 0 (0%)             |         |
| White                             | 26 (55.3%)            | 9 (37.5%)                | 12 (42.9%)         |         |
| Black                             | 1 (2.1%)              | 1 (4.2%)                 | 2 (7.1%)           |         |
| Asian                             | 1 (2.1%)              | 0 (0%)                   | 0 (0%)             |         |
| Other                             | 0 (0%)                | 2 (8.3%)                 | 0 (0%)             |         |
| Unknown                           | 19 (40.4%)            | 12 (50.0%)               | 14 (50.0%)         |         |
| BMI at CMR, kg/m <sup>2</sup>     | 27.1 ± 5.5            | 26.5 ± 6.0               | 26.7 ± 6.0         | 0.93    |
| <b>Diagnosis</b>                  |                       |                          |                    |         |
| TOF type                          |                       |                          |                    | 0.29    |
| TOF/PS                            | 33 (70.2%)            | 19 (79.2%)               | 24 (85.7%)         |         |
| TOF/PA                            | 14 (29.8%)            | 5 (20.8%)                | 4 (14.3%)          |         |
| TOF/AV canal                      | 0 (0%)                | 0 (0%)                   | 0 (0%)             |         |
| Genetic anomaly                   | 2 (4.3%)              | 3 (12.5%)                | 4 (14.3%)          | 0.28    |
| Additional cardiovascular anomaly | 19 (40.4%)            | 10 (41.7%)               | 14 (50.0%)         | 0.71    |
| Noncardiac abnormality            | 16 (34.0%)            | 15 (62.5%)               | 14 (50.0%)         | 0.06    |
| <b>Prior Procedures</b>           |                       |                          |                    |         |
| Pre-TOF repair palliative shunt   | 27 (57.4%)            | 13 (54.2%)               | 14 (50.0%)         | 0.82    |
| Initial TOF repair type           |                       |                          |                    | 0.72    |
| Transannular patch                | 13 (27.7%)            | 9 (37.5%)                | 9 (32.1%)          |         |
| RV-PA conduit                     | 12 (25.5%)            | 5 (20.8%)                | 4 (14.3%)          |         |
| Nontransannular RVOT patch        | 8 (17.0%)             | 3 (12.5%)                | 8 (28.6%)          |         |
| Other/unknown                     | 14 (29.8%)            | 7 (29.2%)                | 7 (25.0%)          |         |
| Post-repair cardiac procedures    | 32 (68.1%)            | 16 (66.7%)               | 21 (75.0%)         | 0.77    |
| Post-repair PVR                   | 31 (66.0%)            | 14 (58.3%)               | 13 (46.4%)         | 0.25    |
| <b>CMR Measurement</b>            |                       |                          |                    |         |
| RVEDVi, mL/m <sup>2</sup>         | 156.9 ± 57.2          | 148.2 ± 55.1             | 163.3 ± 72.1       | 0.68    |
| RVESVi, mL/m <sup>2</sup>         | 94.3 ± 44.6           | 81.3 ± 39.6              | 102.2 ± 62.3       | 0.31    |

| <b>Variable</b>                  | <b>Cardiac death<br/>N=47</b> | <b>Noncardiac death<br/>N=24</b> | <b>Unknown<br/>N=28</b> | <b>p-value</b> |
|----------------------------------|-------------------------------|----------------------------------|-------------------------|----------------|
| RV EF, %                         | 41.4 ± 9.8                    | 47.1 ± 10.7                      | 40.4 ± 12.4             | 0.06           |
| RV mass index, g/m <sup>2</sup>  | 38.1 ± 14.9                   | 34.8 ± 17.2                      | 42.8 ± 19.9             | 0.23           |
| RV mass/volume ratio, g/mL       | 0.25 ± 0.09                   | 0.24 ± 0.07                      | 0.27 ± 0.09             | 0.32           |
| RV VAC                           | 1.57 ± 0.73                   | 1.27 ± 0.71                      | 1.77 ± 1.05             | 0.10           |
| LVEDVi, mL/m <sup>2</sup>        | 102.1 ± 40.6                  | 86.2 ± 17.3                      | 95.2 ± 29.5             | 0.17           |
| LVESVi, mL/m <sup>2</sup>        | 53.4 ± 36.8                   | 37.9 ± 12.8                      | 46.1 ± 21.8             | 0.10           |
| LV EF, %                         | 50.9 ± 11.6                   | 56.4 ± 8.4                       | 52.5 ± 15.2             | 0.20           |
| LV mass, index, g/m <sup>2</sup> | 64.9 ± 23.5                   | 55.3 ± 17.2                      | 67.0 ± 21.7             | 0.12           |
| LV mass/volume ratio, g/mL       | 0.66 ± 0.21                   | 0.65 ± 0.19                      | 0.73 ± 0.20             | 0.32           |
| BVGFI                            | 39.0 ± 9.2                    | 46.3 ± 10.8                      | 38.4 ± 10.9             | 0.009          |
| RV/LV EDV ratio                  | 1.66 ± 0.64                   | 1.74 ± 0.63                      | 1.84 ± 0.87             | 0.60           |
| <b>Arrhythmia Measurement</b>    |                               |                                  |                         |                |
| Atrial arrhythmia                | 22 (46.8%)                    | 7 (29.2%)                        | 14 (50.0%)              | 0.26           |
| Nonsustained VT                  | 16 (34.0%)                    | 4 (16.7%)                        | 9 (32.1%)               | 0.29           |
| Pacemaker                        | 4 (8.5%)                      | 0 (0%)                           | 1 (3.6%)                | 0.28           |
| ICD                              | 7 (14.9%)                     | 2 (8.3%)                         | 4 (14.3%)               | 0.72           |
| QRS duration, ms                 | 165.0 ± 26.8                  | 153.3 ± 23.1                     | 155.3 ± 30.1            | 0.14           |

TOF indicates tetralogy of Fallot; CMR, cardiovascular magnetic resonance imaging; BMI, body mass index; PS, pulmonary stenosis; PA, pulmonary atresia; AV, atrioventricular; RV-PA, right ventricle-pulmonary artery; RVOT, right ventricular outflow tract; PVR, pulmonary valve replacement; RV, right ventricle; EDVi, end-diastolic volume index; ESVi, end systolic volume index; EF, ejection fraction; LV, left ventricle; BVGFI, biventricular global function index; VT, ventricular tachycardia; ICD, implantable cardioverter defibrillator.

**Table S2. Kaplan-Meier Estimates of Survival by Risk Score Group.**

|                            | <b>Survival (95% CI)</b> |                   |                   |         |
|----------------------------|--------------------------|-------------------|-------------------|---------|
|                            | 5-year rate              | 10-year rate      | 15-year rate      | p-value |
| <b>Development</b>         |                          |                   |                   |         |
| Low risk (score $\leq 4$ ) | 0.99 (0.98, 1.00)        | 0.97 (0.95, 0.98) | 0.95 (0.93, 0.97) | <0.001  |
| High risk (score $> 4$ )   | 0.89 (0.83, 0.93)        | 0.74 (0.65, 0.81) | 0.56 (0.45, 0.66) |         |
| <b>External Validation</b> |                          |                   |                   |         |
| Low risk (score $\leq 4$ ) | 1.00 (1.00, 1.00)        | 0.96 (0.93, 0.98) | 0.95 (0.91, 0.97) | <0.001  |
| High risk (score $> 4$ )   | 0.93 (0.85, 0.97)        | 0.83 (0.72, 0.90) | 0.74 (0.61, 0.83) |         |

Model performance: c-index of 0.76 [95% CI, 0.70, 0.81] and 0.71 [95% CI, 0.62, 0.80] on development and external validation cohorts, respectively.

**Table S3. Multivariable Cox Regression Model for the Composite Secondary Outcome in the Development Cohort.**

| <b>Variable</b>                    | <b>HR</b>         | <b>95% CI</b> | <b>p-value</b> |
|------------------------------------|-------------------|---------------|----------------|
| Age at CMR, years                  | 1.04              | 1.02, 1.05    | <0.001         |
| Additional cardiac procedures*     | 2.22              | 1.60, 3.08    | <0.001         |
| RV ESVi (mL/m <sup>2</sup> )       | 1.08 <sup>†</sup> | 1.04, 1.12    | <0.001         |
| LV mass index (mL/m <sup>2</sup> ) | 1.27 <sup>†</sup> | 1.15, 1.40    | <0.001         |

\* time-dependent covariate.

† per 10-unit increase

Sample size of n=1090 with 172 composite secondary outcome events. Model performance during development: c-index 0.72 [95% CI, 0.67, 0.76] and external validation: c-index 0.69 [95% CI, 0.61, 0.77].

HR indicates hazard ratio; CI, confidence interval; CMR, cardiac magnetic resonance; RV, right ventricle; LV, left ventricle; ESVi, end-systolic volume index; BSA, body surface area.

**Figure S1. Kaplan-Meier Estimated Survival in Repaired Tetralogy of Fallot Stratified by Cohort.**

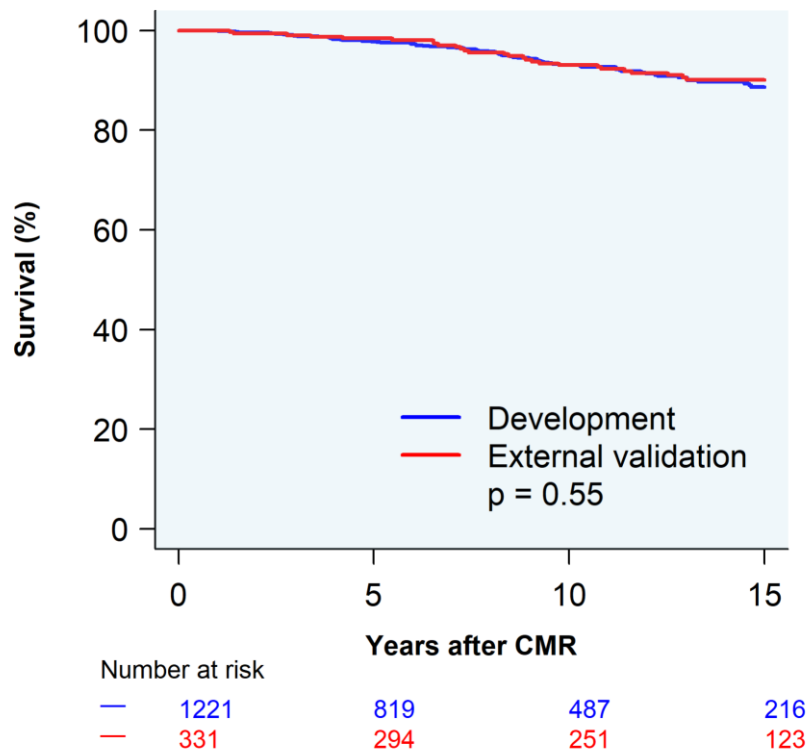

CMR indicates cardiac magnetic resonance.

**Figure S2. Survival of rTOF Patients After Repair in the Development and Validation Cohorts.**

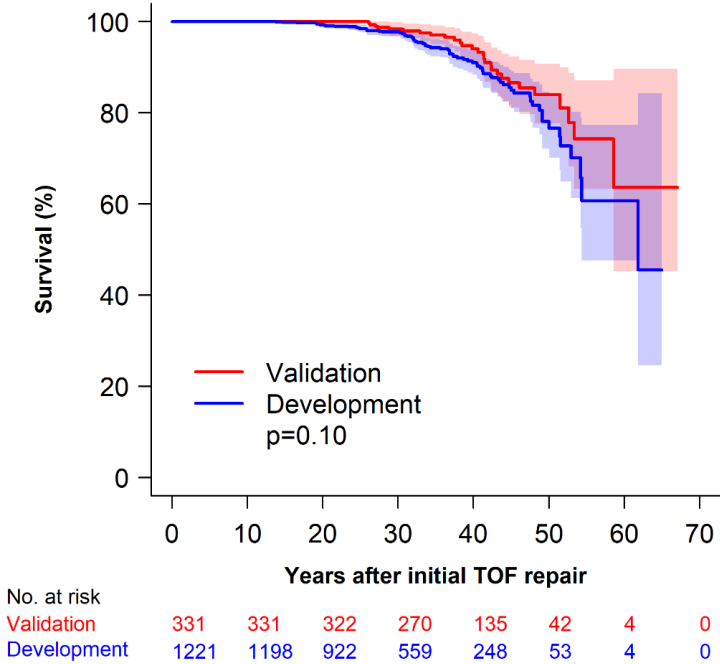

TOF indicates tetralogy of Fallot.

**Figure S3. Kaplan-Meier Estimated Survival in Repaired Tetralogy of Fallot Deaths, Stratified by Cause of Death.**

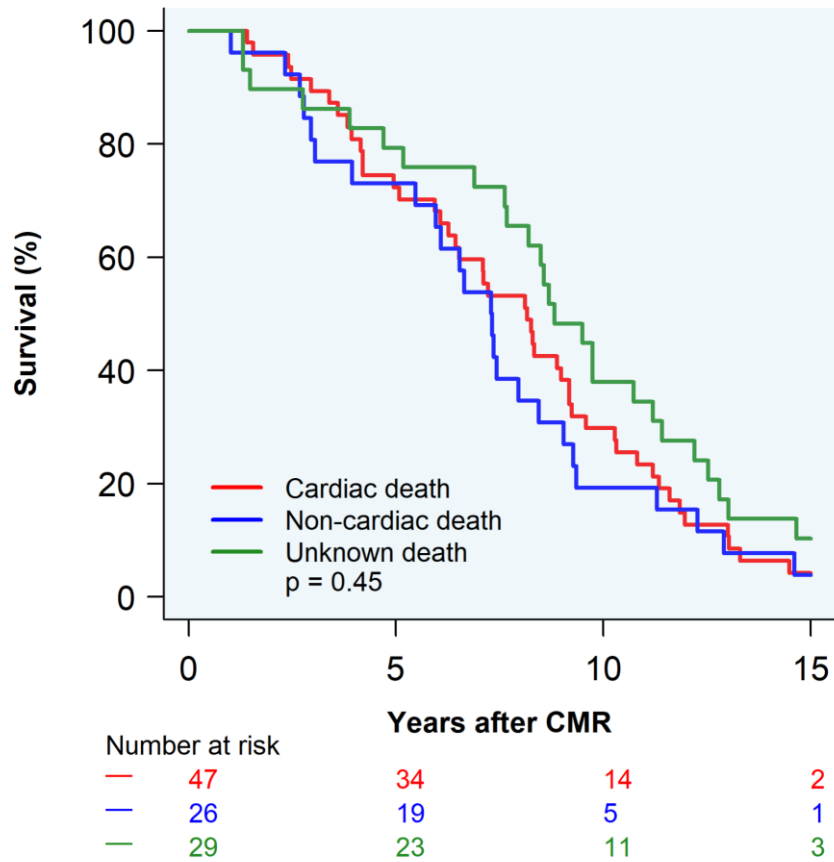

CMR indicates cardiac magnetic resonance.



**Figure S4. Histograms of Mortality Risk Scores in the Development and External Validation Cohorts.**

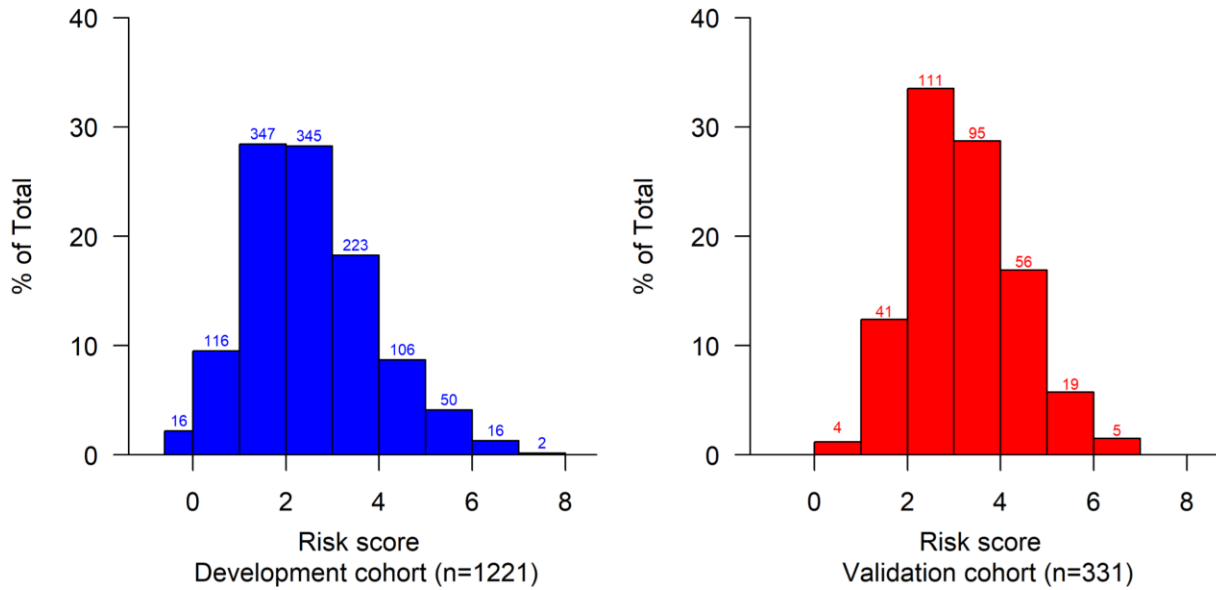

The distribution of risk scores within the development (left; blue) and external validation (right; red) cohorts, with a mean score of  $2.52 \pm 1.36$  (range -0.6 to 7.7) in the development cohort and  $3.22 \pm 1.15$  (range 0.5 to 6.5) in the external validation cohort. Note that negative risk scores can be achieved with  $BVGFI > 48$  with otherwise low-risk factors (i.e., younger age at CMR,  $BMI < 30 \text{ kg/m}^2$ , transannular patch repair, and normal  $RVESVi$ ).

**Figure S5. 10-Year Calibration Plots in the Development and External Validation Cohorts.**

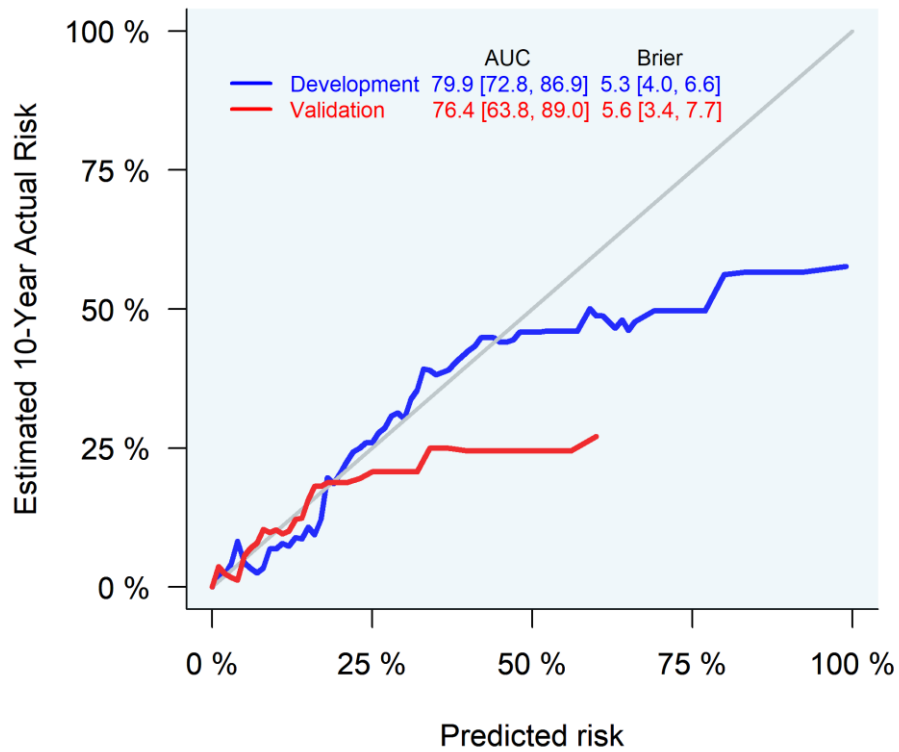

Calibration plots of predicted vs. actual 10-year mortality for development (blue) and validation (red) cohorts.  
AUC indicates area under the curve.

**Figure S6. Cumulative Incidence Functions for Study Outcomes in the Development Cohort.**

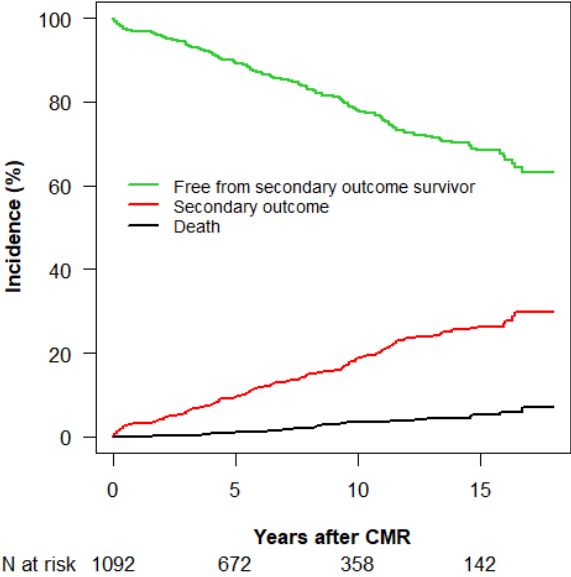

CMR indicates cardiac magnetic resonance.
